# Supplementary material
Source: PubMed Central journal article supplement (PMC10771629)
Supplement: NIHMS1925369-supplement-Supplemental_Publication_Material.pdf [file NIHMS1925369-supplement-Supplemental_Publication_Material.pdf]

# **Supplemental Material**

# **Conditional, tissue-specific CRISPR/Cas9 vector system in zebrafish reveals the role of neuropilin-1b in heart regeneration.**

**Authors** Ramcharan Singh Angom<sup>1</sup>, Ying Wang<sup>1, 2</sup>, Enfeng Wang<sup>1</sup>, Shamit Dutta<sup>1</sup>, Debabrata Mukhopadhyay<sup>1\*</sup>

## **Affiliation**

1 Department of Biochemistry and Molecular Biology, College of Medicine and Science, Mayo Clinic, Jacksonville, FL 32224

2 Department of Cardiovascular Medicine, Mayo Clinic, Rochester, MN 55905

3 Department of Biochemistry and Molecular Biology, College of Medicine and Science, Mayo Clinic, Rochester, MN 55905

## **Correspondence**

Debabrata Mukhopadhyay, PhD

Department of Biochemistry and Molecular Biology

Mayo Clinic College of Medicine and Science

4500 San Pablo Road South

Jacksonville

FL 32224

**E-mail:** Mukhopadhyay.debabrata@mayo.edu

Figure S1

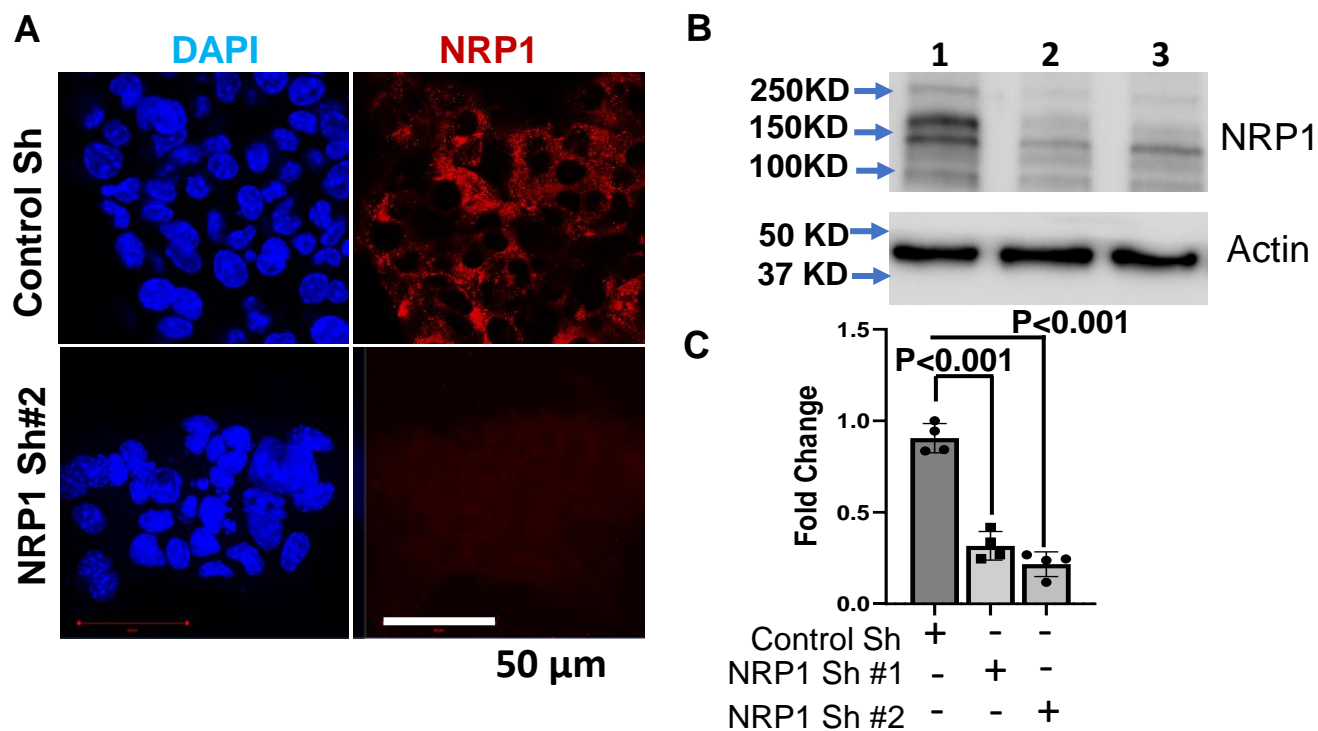

**Figure S1: NRP1 antibody validation in Cardiomyocytes.** (A). Immunofluorescence staining of Control shRNA and NRP1 shRNA treated mouse cardiomyocytes (HL-1) with NRP1 antibody (red) (Neuropilin-1 (D62C6) Rabbit mAb #3725). (B). Western blotting showing the NRP1 downregulation in HL-1 cardiomyocyte infected with NRP1 shRNA #1 and NRP1shRNA #2. (C). Quantification showing the fold change in protein expression from B. Error bars represents the mean  $\pm$  SEM. The western experiment was repeated three times.. Statistical significance was evaluated with Prism 9.0 software by using Student's *t*-test. P values below 0.05 were considered significant and if lower as indicated.

Figure S2

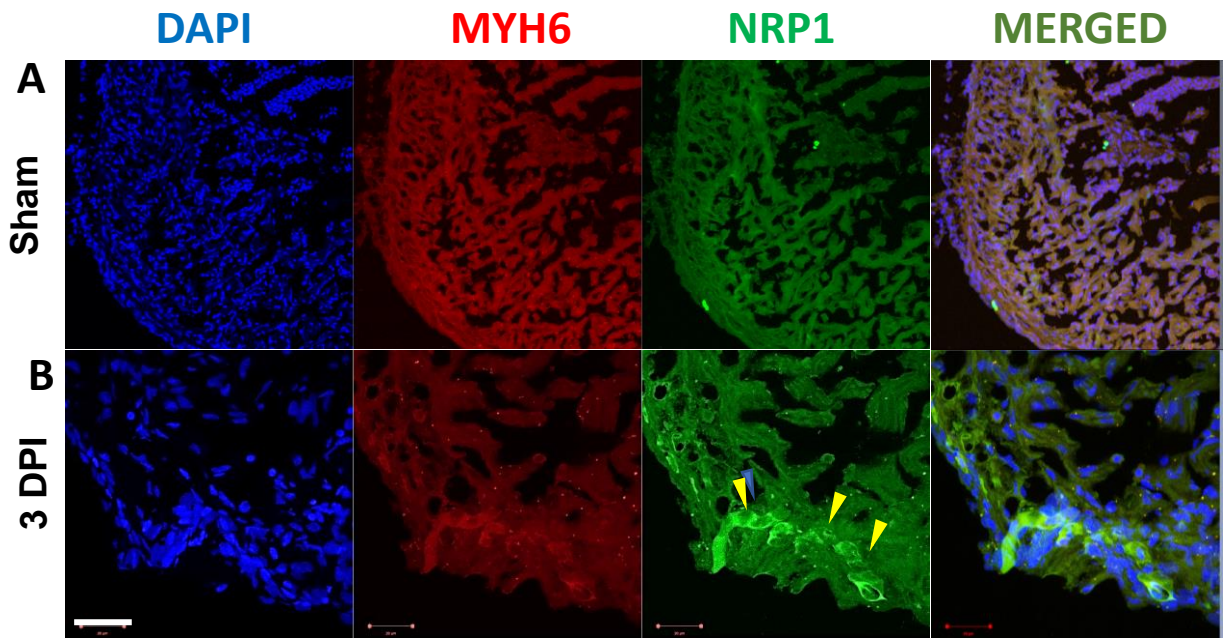

**Figure S2: NRP1 is upregulated in the injured cardiomyocytes.** (A) Confocal image showing NRP1 and MYH6 costaining in uninjured zebrafish ventricle cryosection and (B) Confocal image showing NRP1 and MYH6 costaining in zebrafish ventricle after injury (3 day after cryoinjury). Yellow arrowhead indicated the NRP1 over-expression at injury site. Scale = 20 $\mu$ m

Figure S3

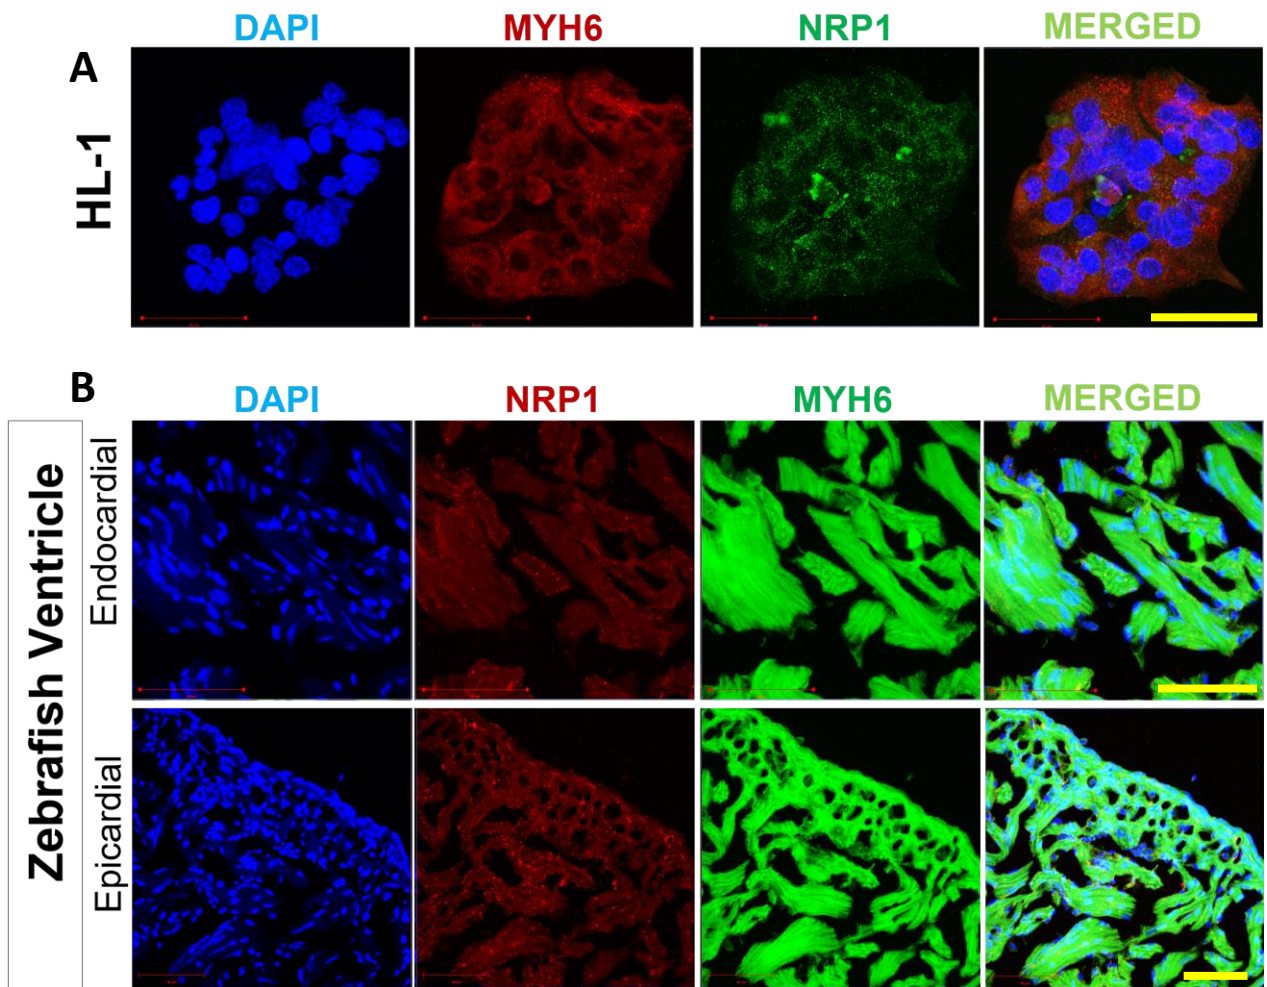

**Figure S3: NRP1 expression in cardiomyocytes.** (A). Confocal image showing NRP1 and cardiomyocyte marker, MYH6 (Anti-MYH6 antibody [3-48] ab15) costaining in mice ventricle cardiomyocyte (HL-1). (B). NRP1 and cardiomyocyte marker (MYH6) costaining in adult zebrafish ventricle. Scale = 50 $\mu$ m.



A

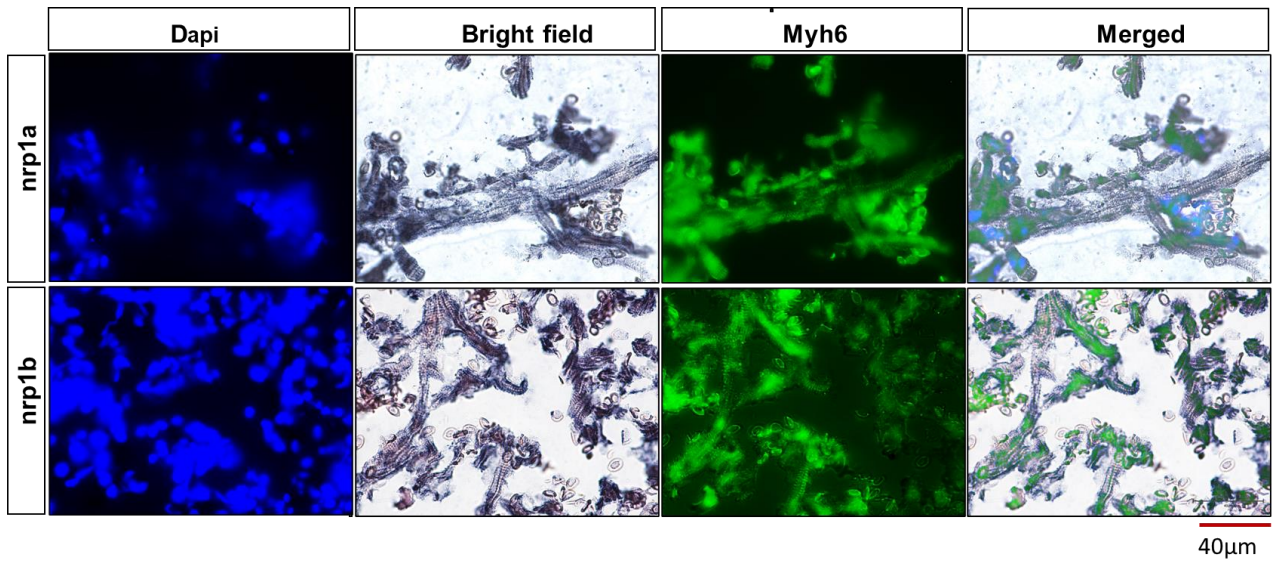

B

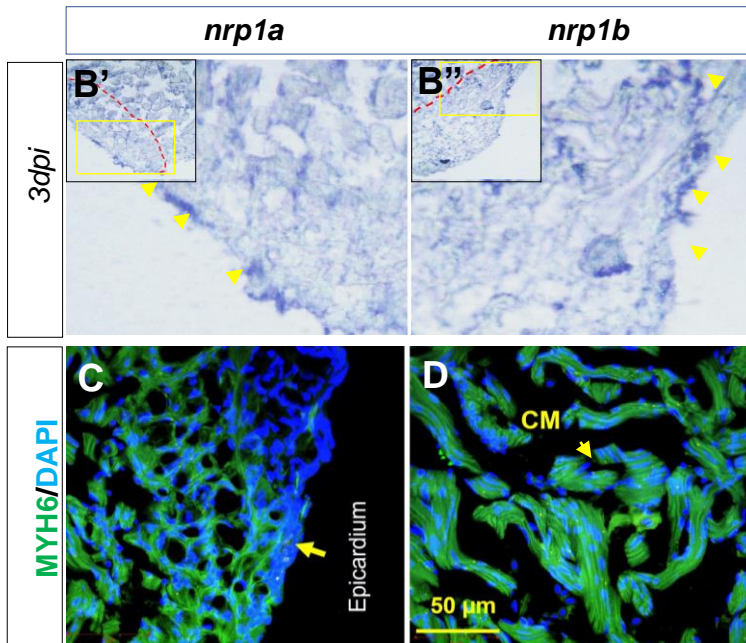

**Figure S4: Cardiomyocytes specific expression of nrp1a and nrp1b in zebrafish. (A-B).** In situ hybridization showing nrp1a expression in adult wild type heart ventricle section

**A.** Representative image showing 6-month-old zebrafish ventricle sections double stained for *in-situ hybridization* of nrp1a and nrp1b expression (purple) and immunofluorescence-stained myosin heavy chain 6 (MYH6) expression in green. Nuclei are labeled with dapi (blue) **B.** nrp1a and nrp1b expression at injury site in adult wildtype heart ventricle (B'; nrp1a in situ hybridization showing nrp1a expression in heart ventricle section after 3 dpi, B''; nrp1b expression in heart ventricle section after 3 dpi. **(C-D).** Confocal image of zebrafish ventricle cryosection stained with cardiomyocytes-specific myosin heavy chain 6 (green) and nuclear-DAPI. ( C; Periphery and D; inner region). Image were captured by EVOS M5000 Microscope using 63x objective in A. Zeiss confocal microscope in C and D. Yellow arrowhead indicates the cardiomyocyte. Yellow arrow indicates epicardium. Yellow box indicate the enlarged area analyzed. N=5 images were analyzed for each group.

Figure S5

A

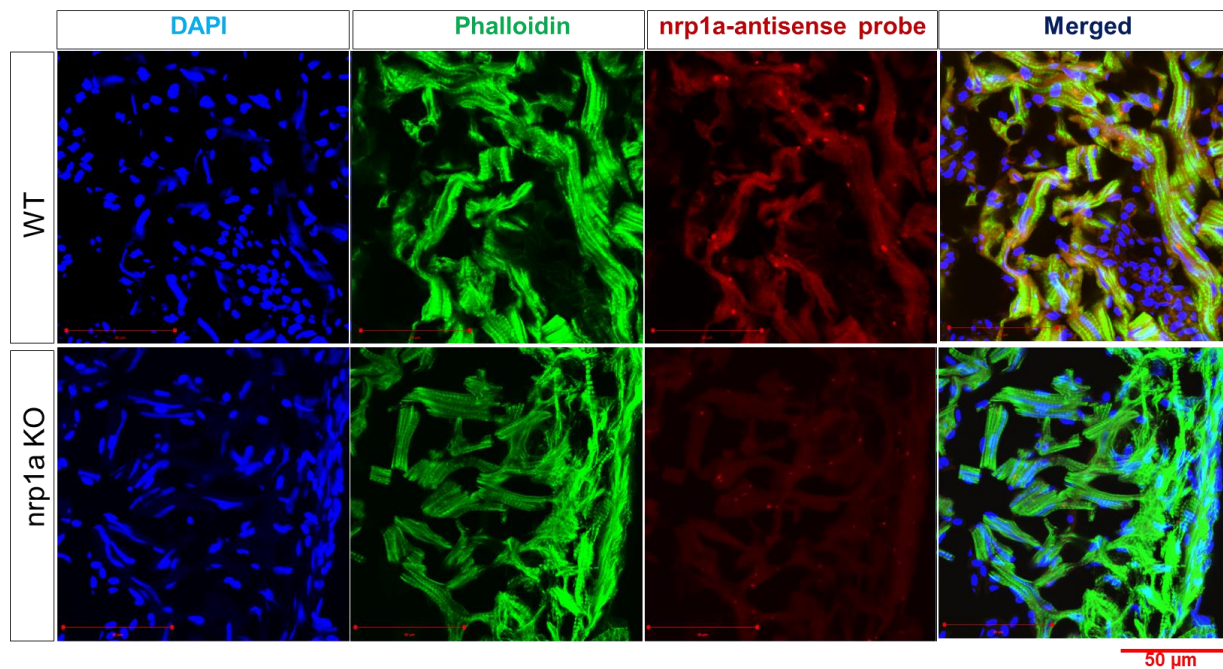

B

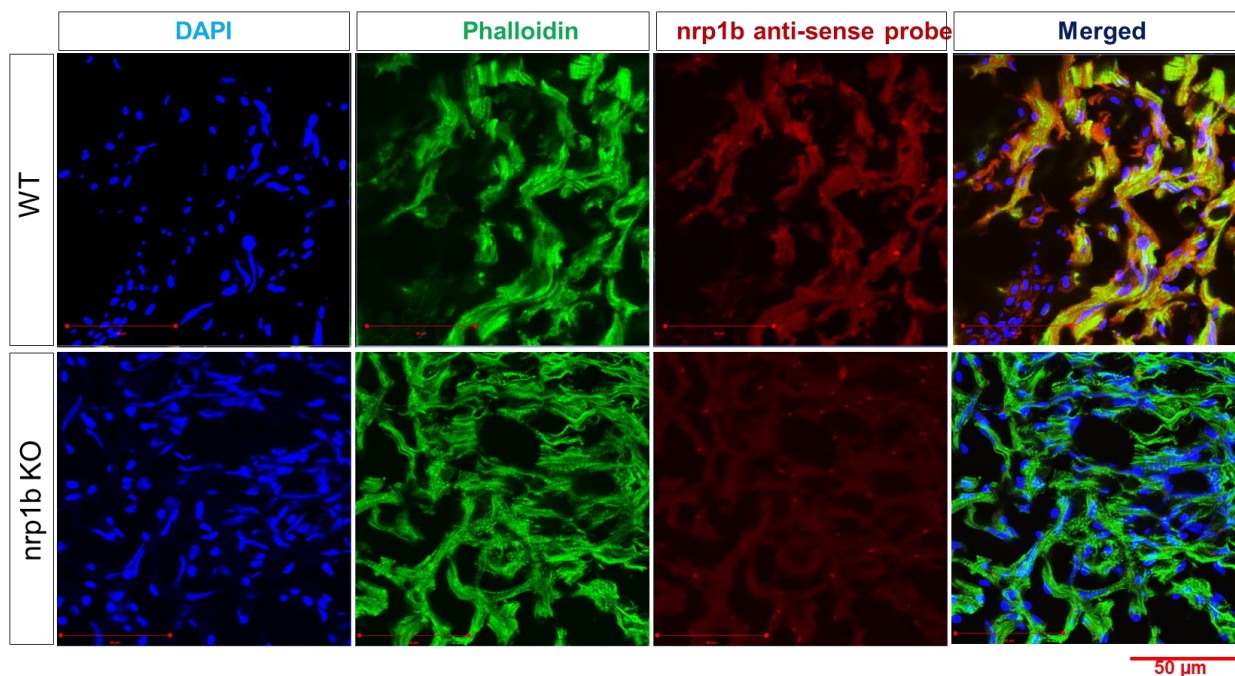

**Figure S5:** Representative Z-stack confocal image showing the Fluorescence *in situ* (FISH) staining of nrp1a and nrp1b in the CMs using antisense nrp1a and nrp1b specific probes labelled with Cy3 and CMs labelled with CM specific F-actin (Alexa - 488 - phalloidin) in Wt and nrp1a and nrp1b knocked out heart ventricle section. Images were captured by using Zeiss confocal microscope (LSM 880) using 63x objective. nrp1a and nrp1b in Red, F-actin in green, Nuclei in blue, Yellow : merged. Scale bar = 50μm. 5 images were analyzed in each group.



Figure S6

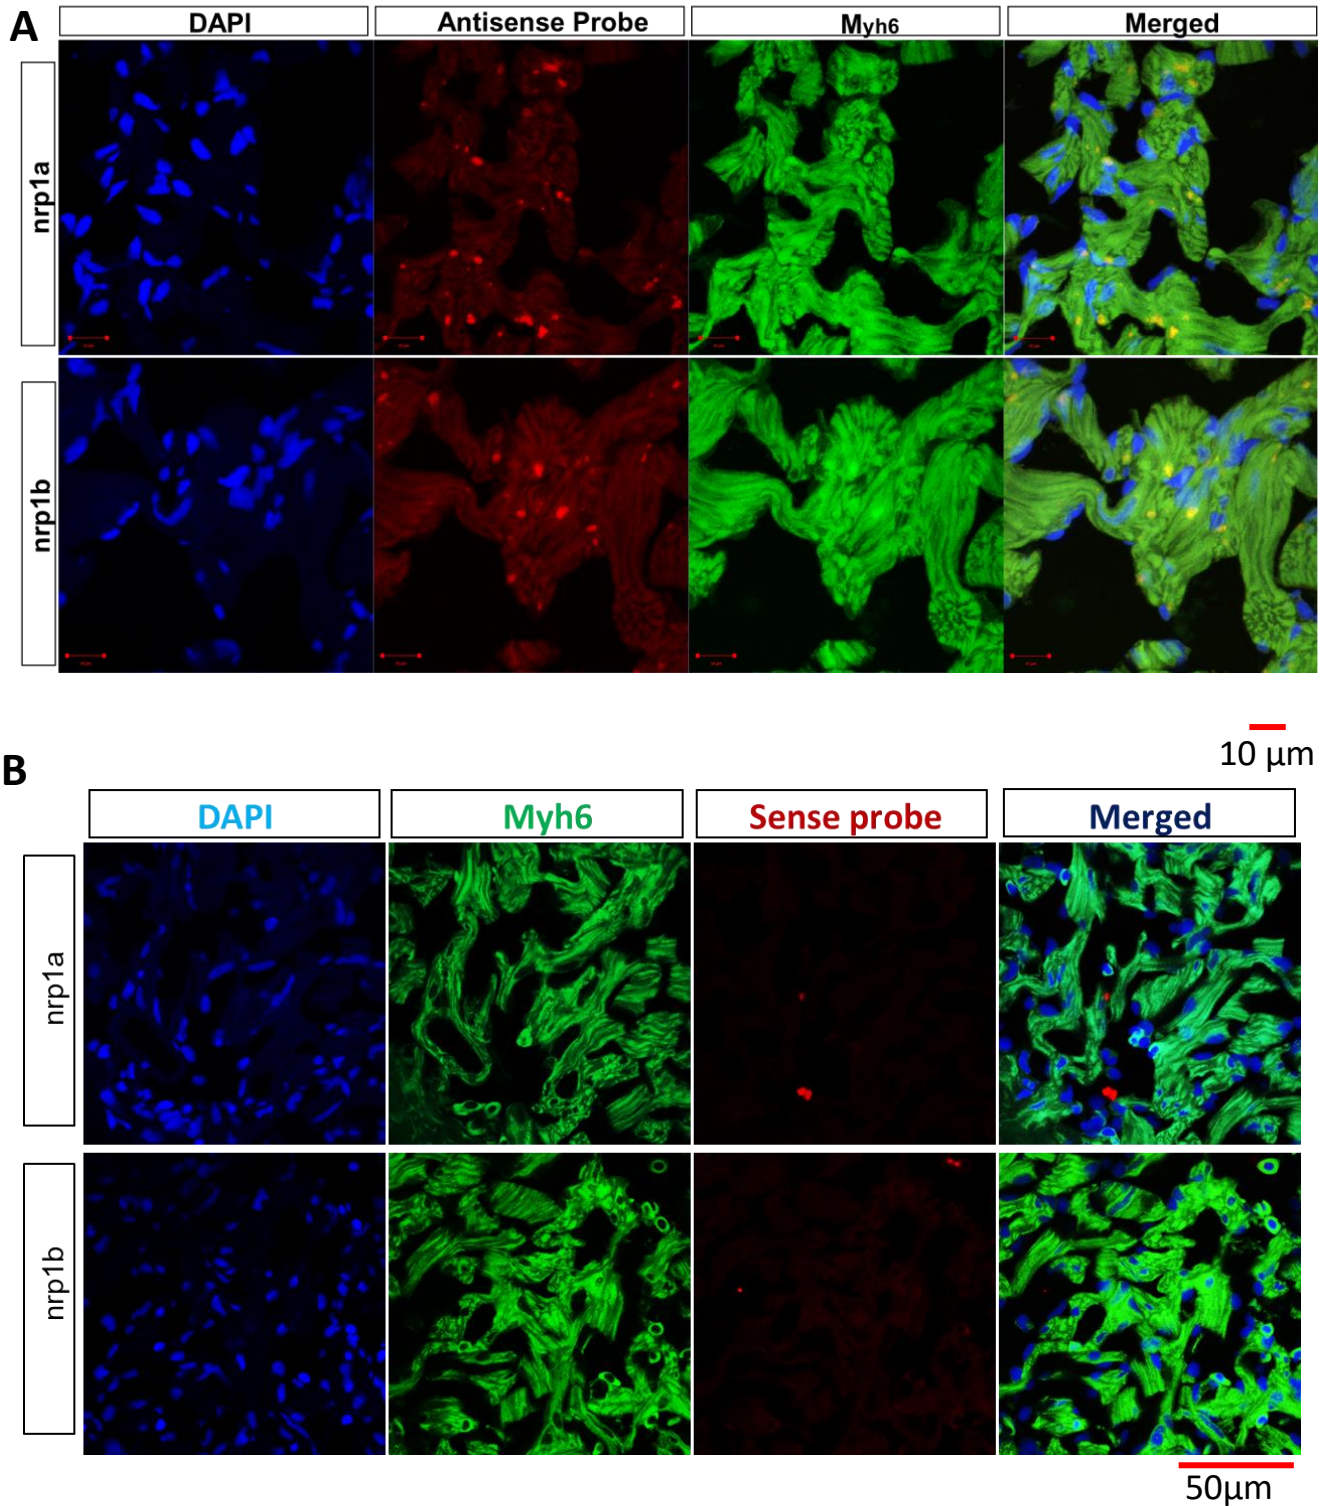

**Figure S6: A.** Representative Z-stack confocal image showing the Fluorescence *in situ* (FISH) staining of nrp1a and nrp1b in the CMs using antisense nrp1a and nrp1b specific probes labelled with Cy3 and CMs labelled with cardiac myosin heavy chain 6 (Myh6) in Wt heart ventricle section. **B.** Representative Z-stack confocal image showing the Fluorescence *in situ* (FISH) staining of nrp1a and nrp1b in the CMs using sense nrp1a and nrp1b specific probes labelled with Cy3 and CMs labelled with CM specific MYH6 in WT heart ventricle section. Images were captured by using Zeiss confocal microscope (LSM 880) using 100x objective in A and 63x objective in B. nrp1a and nrp1b in Red, Myh6 in green, Nuclei in blue, Yellow: merged. Red puncta in A represents nrp1a and nrp1b positive putative non-CM cells. Scale bar = 50 $\mu\text{m}$ . 5 images were analyzed in each group.



Figure S7

**A**

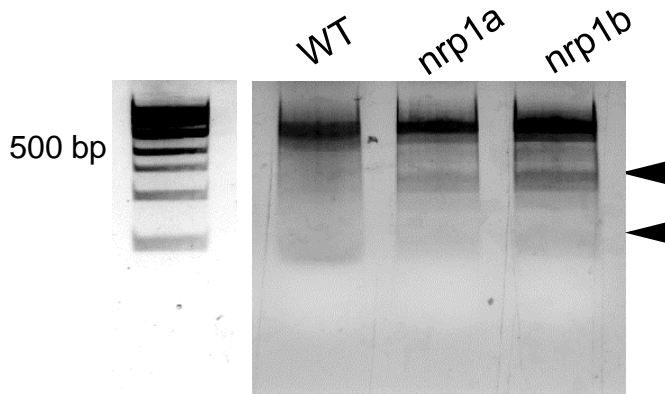

**B**

*nrp1a*

```

ACCCGATACCTGCGGATCCGACCCATTAACTGGGAAACTGGCATCGCACTGCCGGTTCGAGGTCTACGGATGCAAG - WT
CTGACCCGATACCTGCGGATCCGACCCATTAACTGGGAA-----CACTGCCGGTTCGAGGTCTACGGATG
CTGACCCGATACCTGCGGATCCGACCCATTAACTGGGAAA-----TCGCACTGCCGGTTCGAGGTCTACGGATG
CTGACCCGATACCTGCGGATCCGACCCATTAACTGGGAAACTG-----

```

*nrp1b*

```

TCCTAGTAGCATACTAGCGCTAGTGACTGTAGCTGCTGTA GTCTCCATAGTAGTGGCAAGAGGAAGAGG -WT
GTAGCATACTAGCGCTAGTGACTGTAGCTGCTGTA GTCTCCA-----GGCAAGAGGAAGAGGTGTTG
GTAGCATACTAGCGCTAGTGACTGTAGCTGCTGTA GTCT-----GTGGCAAGAGGAAGAGGTGTTGTG
GTAGCATACTAGCGCTAGTGACTGTAGCTGCTGTA GTCT-----GCAAGAGGAAGAGGTGTTGT
GTAGCATACTAGCGCTAGTGACTGTAGCTGCTGTA GTCT-----

```

**Figure S7: CRISPR cas9 mediated genome editing in *nrp1a* and *nrp1b*.** (A). T7E1 mutagenesis assay at the CRISPR target site in the *nrp1a* and *nrp1b* gene. The assay was performed on genomic DNA from 4 dpf embryos injected at the one-cell stage with Cas9 mRNA and either a gRNA against *nrp1a* or a gRNA against *nrp1b*. Cleavage bands (arrowheads) indicate the presence of mutations at the target site. (B). Representative sequencing result showing the mutation sites.

Figure S8

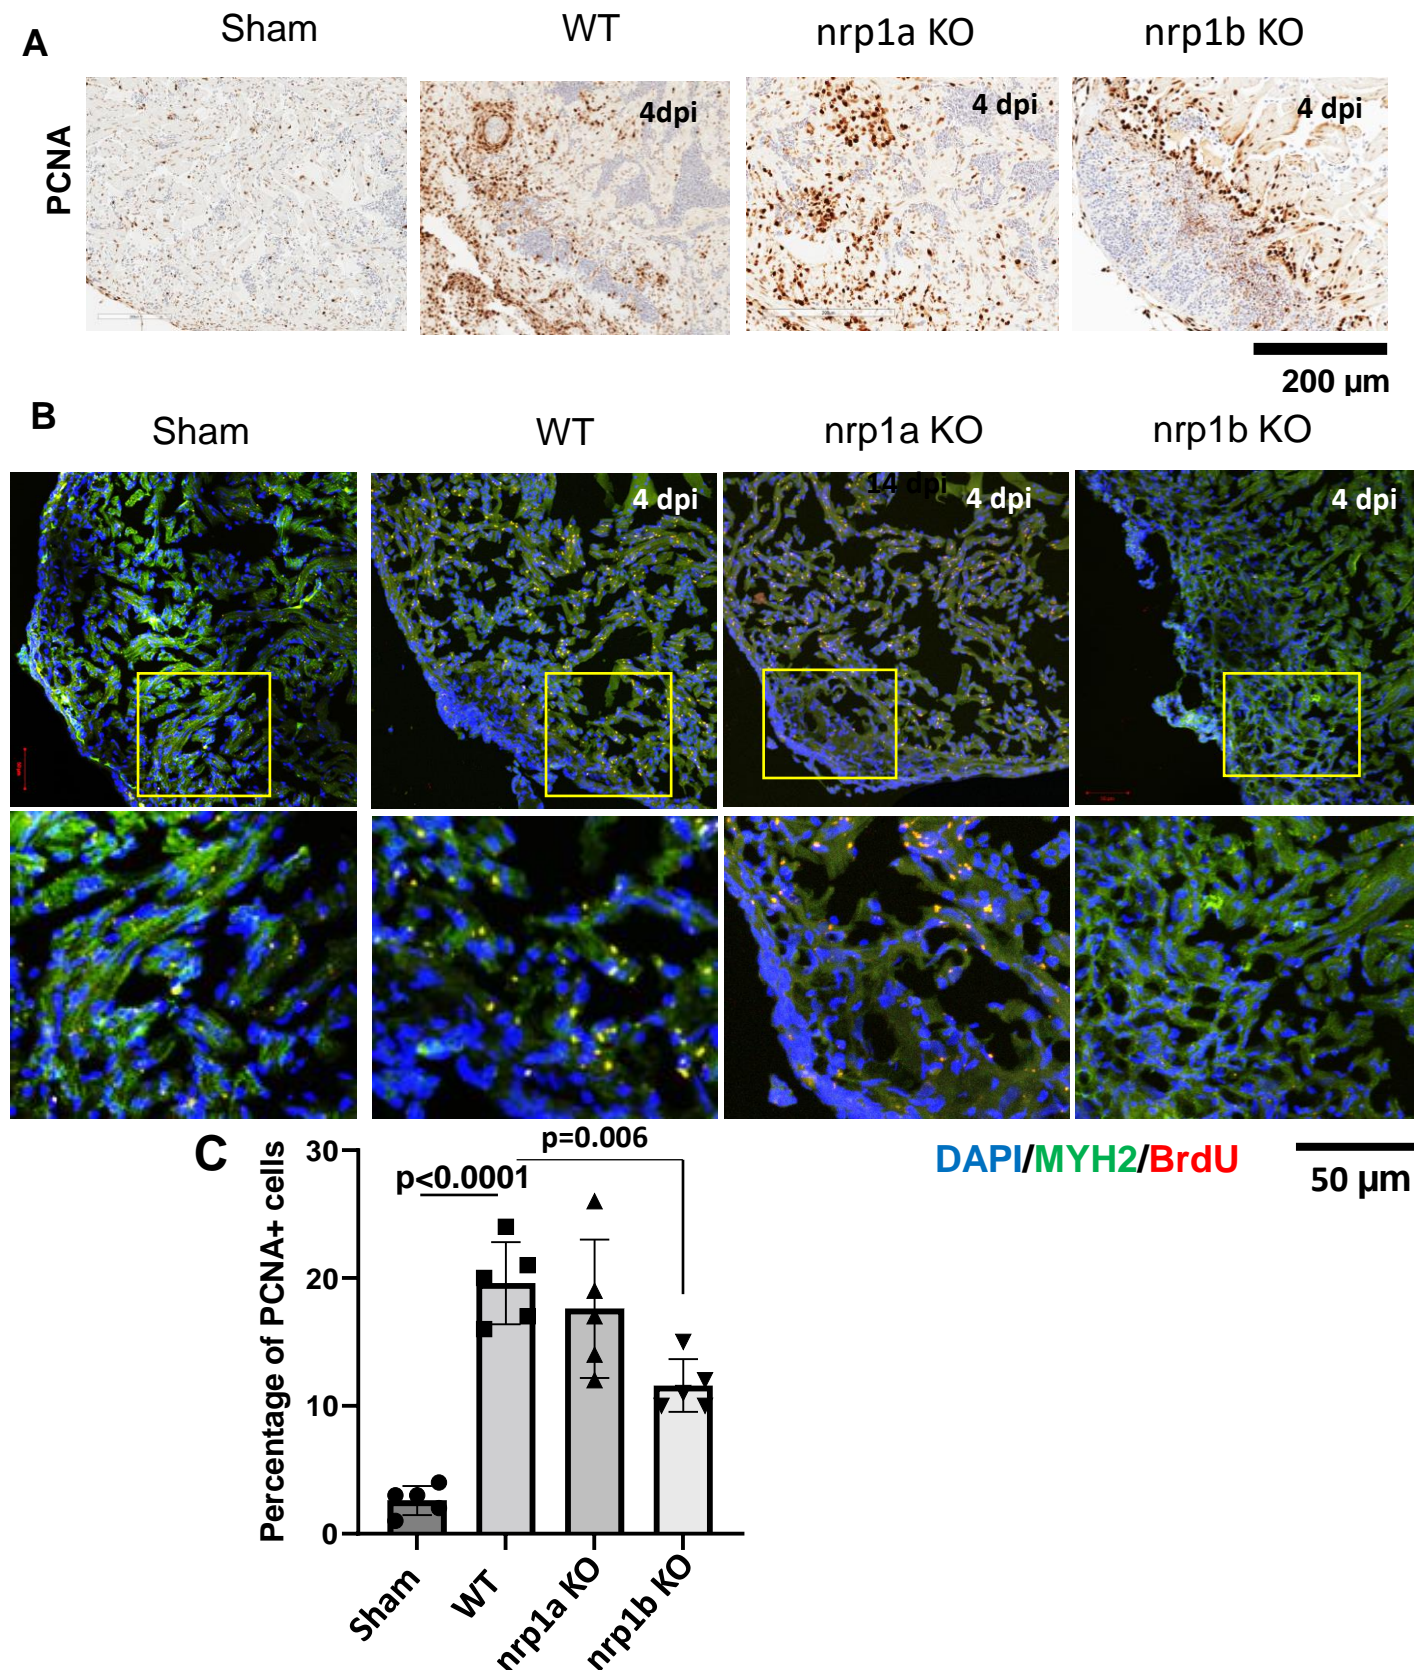

**Figure S8: nrp1b ablation reduced the proliferation of cardiomyocyte after cryoinjury. (A).** PCNA staining showing proliferative cells in WT-sham, WT- 4 dpi and CM specific nrp1a/nrp1b KO zebrafish adult heart section after 4 dpi. **(B).** Representative confocal image showing the BrdU staining in WT- sham, WT-4 dpi and CM specific nrp1a/nrp1b KO zebrafish adult heart section after 4 dpi. **(C).** Quantification of the BrdU staining in B. Yellow square box indicates the analyzed area. Error bars represents the mean  $\pm$  standard deviation (N=5 different images were analyzed for the quantification). Statistical significance between two groups was evaluated with Prism 9.0 software by using nonpaired, two-tailed Student's *t*-test. P values below 0.05 were considered significant and if lower as indicated.

Figure S9

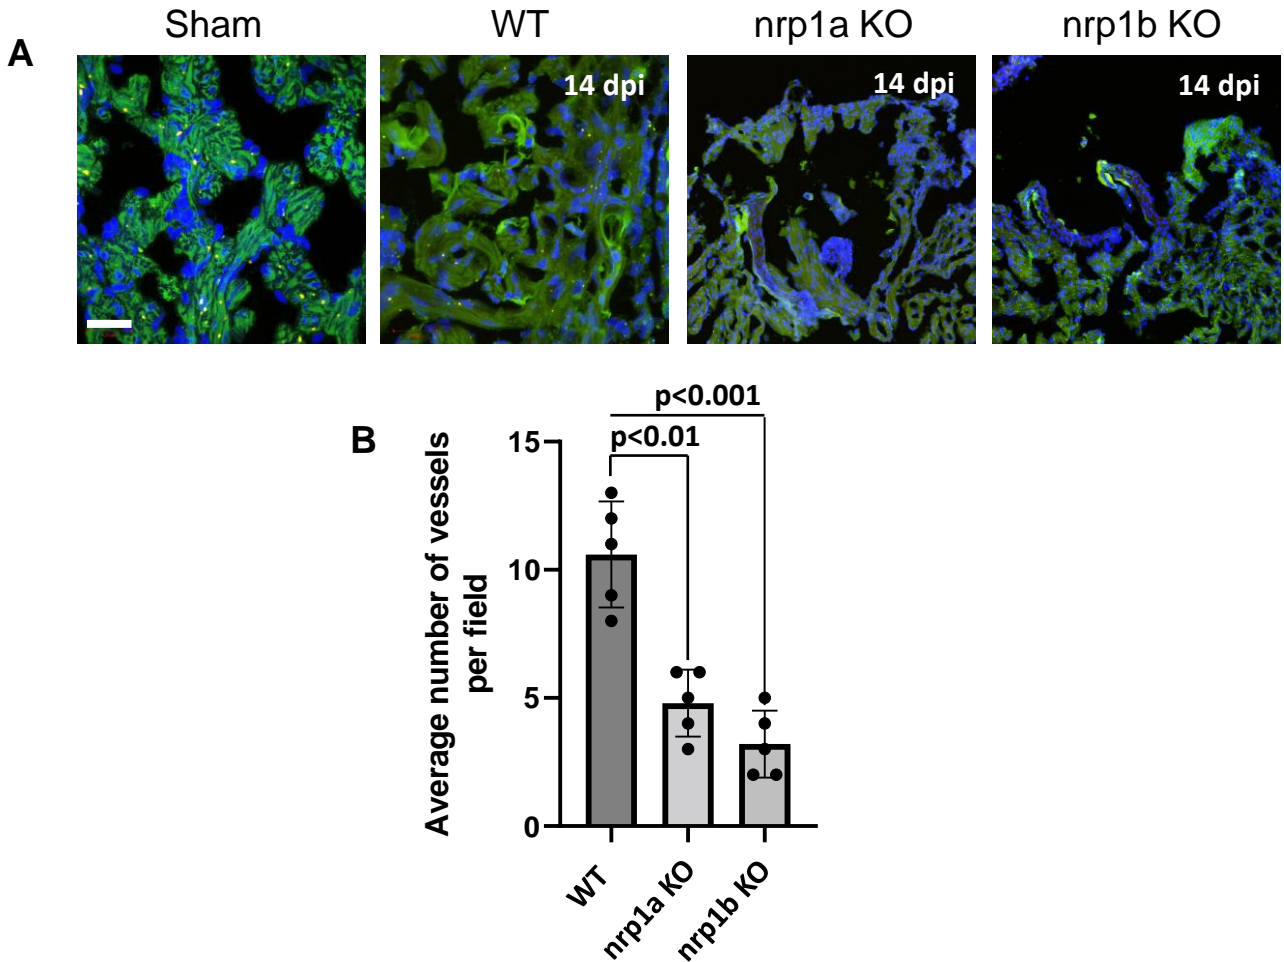

**Figure S9: Neovascularization of the cryoinjured area is impaired in cardiomyocyte specific *nrp1a* and *nrp1b* KO. (A).** Confocal image of ventricle section showing the VE-cadherin (green) in the WT-sham, WT- 4 dpi, and CM specific nrp1a/nrp1b KO zebrafish adult heart section (4 dpi). **(B).** Quantification showing the number of neo-vessels in the four groups. Scale bar= 20 $\mu$ m. Error bars represents the mean  $\pm$  SEM (N=5 images were analyzed per group). Statistical significance was evaluated with Prism 9.0 software by using *one* Way ANOVA. P values below 0.05 were considered significant and if lower as indicated.



Figure S10

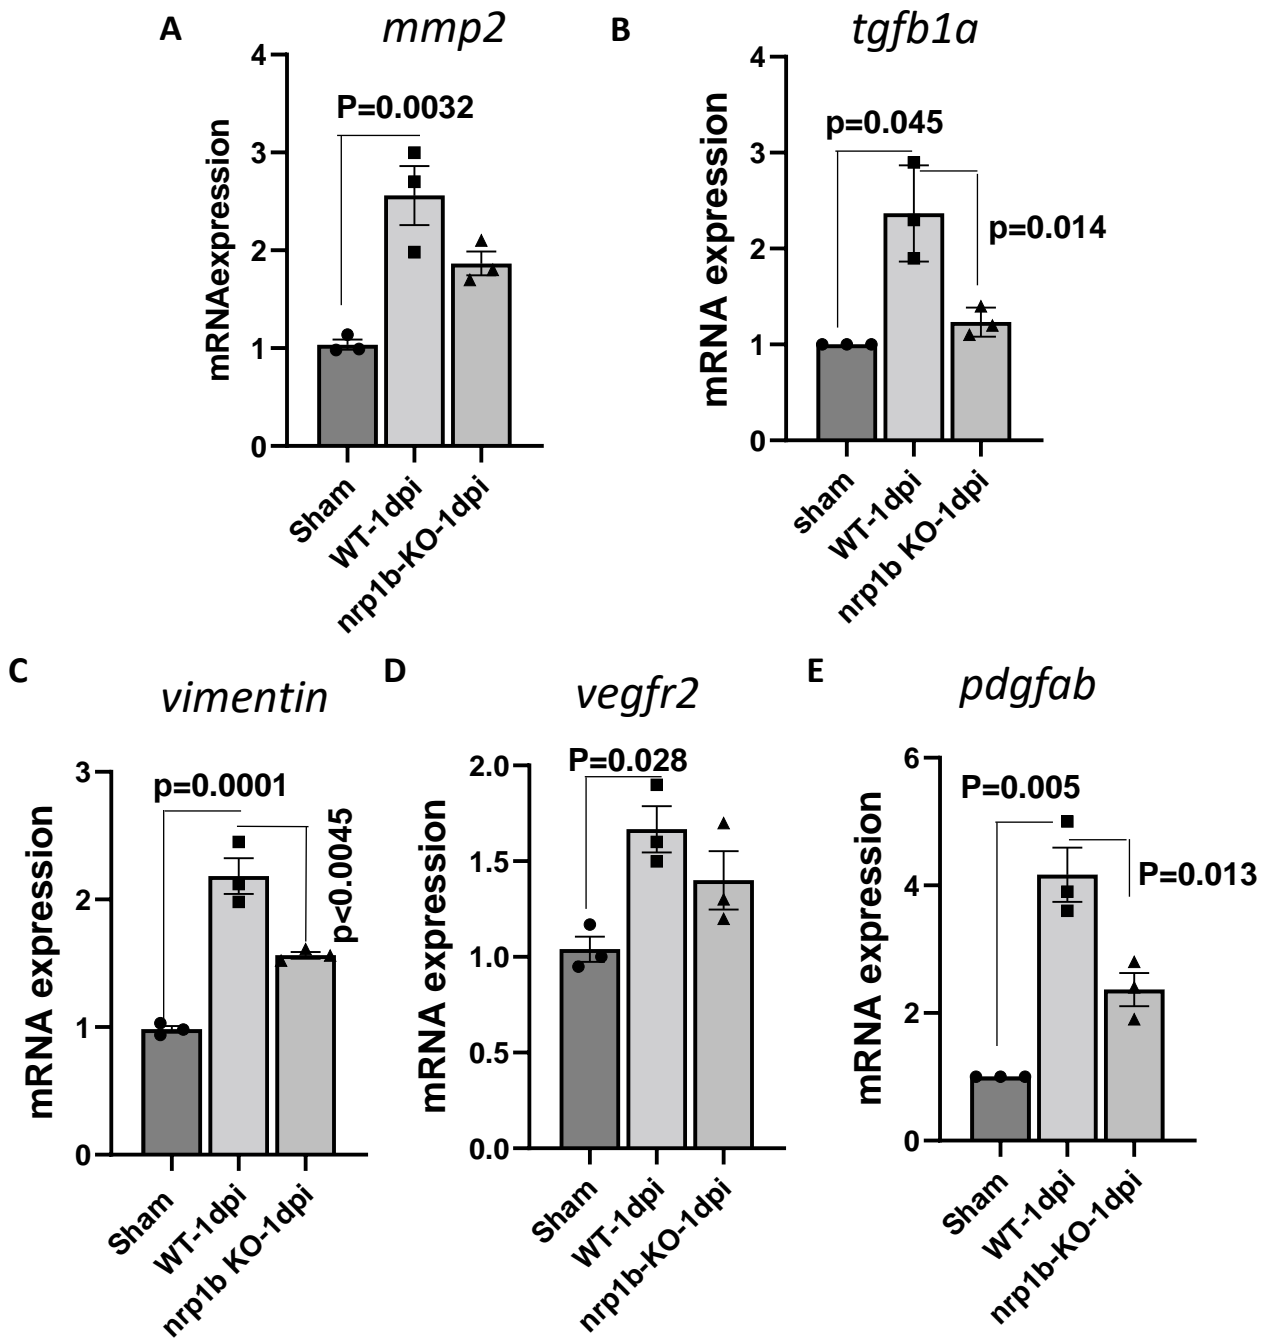

**Figure S10: RNA expression of MMP2 and vimentin in the injured heart. (A)** Relative mRNA expression of MMP2 in control, cardiac specific nrp1a and nrp1b KO heart after cryoinjury (1 dpi). **(B and C)** Relative mRNA expression of EMT marker genes expression in control, cardiac specific nrp1a and nrp1b KO heart. **(D and E)** Angiogenesis marker in. Error bars represents the mean  $\pm$  SEM and the experiments were repeated at least three times.. Statistical significance was evaluated with Prism 9.0 software by using *one*-Way ANOVA with Sidak' s multiple comparison. P values below 0.05 were considered significant and if lower as indicated.

Figure S11

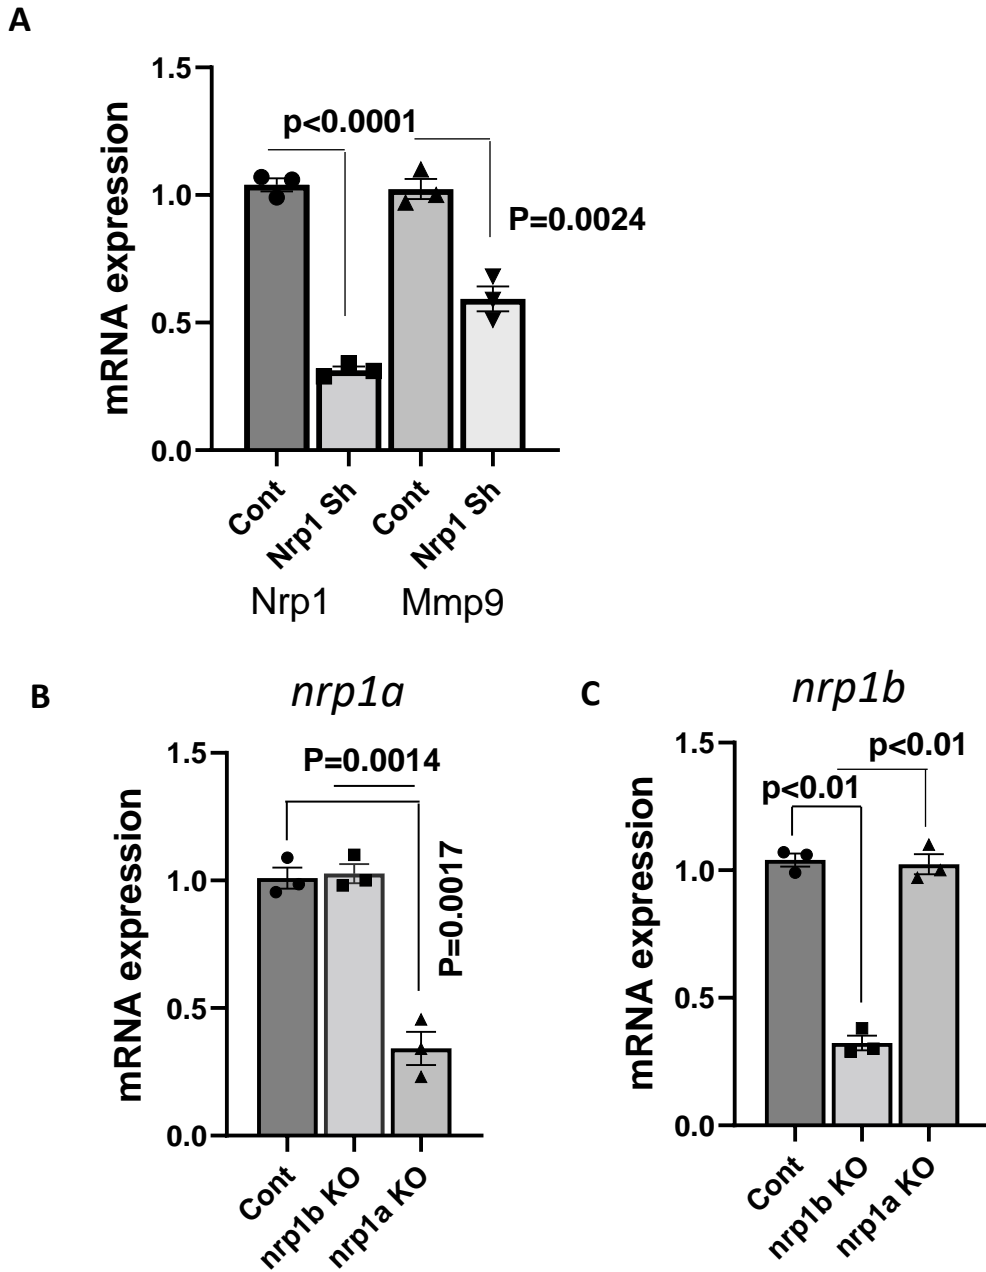

**Figure S11: Compensatory effect *nrp1a* and *nrp1b*.** (A) Relative mRNA expression of Nrp1 and MMP9 in control, and NRP1 shRNA#2 transfected mice ventricle cardiomyocyte (HL-1). (B). Relative mRNA expression of *nrp1a* in control, cardiac specific *nrp1a* and *nrp1b* KO heart. (C). Relative mRNA expression of *nrp1b* in control, cardiac specific *nrp1a* and *nrp1b* KO heart. Error bars represents the mean  $\pm$  SEM and the experiments were repeated at least three times. Statistical significance was evaluated with Prism 9.0 software by using Student's *t*-test in A and One way ANOVA in B and C. P values below 0.05 were considered significant and if lower as indicated.

## Supplemental Table 1. Primer sequences

| Gene           | Forwards                      | Reverse                   |
|----------------|-------------------------------|---------------------------|
| Mmp9           | TGATGTGCTTGGACCACGTAA         | ACAGGAGCACCTTGCCTTTTC     |
| Col1a2         | AAGAACCCCGCTCGTACTTG          | TCCAGTAGAAACCGCTGCTC      |
| Mef2ca         | CCGTCCATGAACATGAGCCT          | ACCGGCTCCGACTTAATGTG      |
| Mef2cb         | GTACAACGAGCCACACGAGA          | CACCTGCACTAGGTGGTCTG      |
| Col1a1         | GGCTTCCAGTTCGAGTATGG          | ATGCAATGCTGTTCTTG CAG     |
| Anp            | GATGTACAAGCGCACACGTT          | TCTGATGCCTCTTCTGTTGC      |
| Vmhl           | TGTTGCAATCCAGACCGTCA          | GCCACTTGTAGGGGTTGACA      |
| Myh6           | GCATTCATTTCTGGGACGAGC         | R GACGTGAAGCCAAGCACATC    |
| Tnnt2a         | AGCAGAGCAGCAGAGAATCC          | R AGAGGTTTTCGTCGATCACC    |
| Myh7           | ATCAGGAGGTGGTTGTAGCC          | GCAGGGTTAGCCTGGATGATT     |
| nppa           | GATGTACAAGCGCACACGTT          | TCTGATGCCTCTTCTGTTGC      |
| nppb           | CATGGGTGTTTTAAAGTTTCTCC       | CTTCAATATTTGCCGCCTTTAC    |
| tnnt2c         | GACCGAACGTGAGAAGAAGA          | AGGACTTCCTGGTGGTTTTTC     |
| Actin          | GCCTACTGGCCAGACGTCACAAA<br>TC | TCCAGCAAACCGGCTTTGCACATAC |
| mouse<br>MMP-9 | CTTCTGGCGTGTGAGTTTCCA         | ACTGCACGGTTGAAGCAAAGA     |
| MMP13          | CCTCCATATGAGGGCGTTGG          | GATACATGAGTGCACCGGGA      |
| pdgfab         | CTGCTGCAACACCGGAAAC           | GATCCTCTAACCGGACCAGC      |
| tgfb1          | CAACCGCTGGCTCTCATTTG          | CCTCTCTGCTGTCTAGCCC       |
| tnfa           | AGACACGACCACAGCACTTC          | CGGCACATTGCCAAGAGTGT      |
| MMP13          | CCTCCATATGAGGGCGTTGG          | GATACATGAGTGCACCGGGA      |
|                |                               |                           |

## sgRNA sequence

nrp1a

1. AGAAATCCAAGATCAACCTGAGG
2. GGGAAACTGGCATCGCACTGCGG

nrp1b

1. GTCTCCATAGTAGTGGCAAGAGG
2. GTCTCACACTAACCTTGGTGGTAGG



## Major Resources Table

In order to allow validation and replication of experiments, all essential research materials listed in the Methods should be included in the Major Resources Table below. Authors are encouraged to use public repositories for protocols, data, code, and other materials and provide persistent identifiers and/or links to repositories when available. Authors may add or delete rows as needed.

### Animals (in vivo studies)

| Species     | Vendor or Source | Background Strain | Sex | Persistent ID / URL                                                                     |
|-------------|------------------|-------------------|-----|-----------------------------------------------------------------------------------------|
| Danio rerio | ZIRC             | WT-AB (ZL1)       | M/F | <a href="https://zebrafish.org/home/guide.php">https://zebrafish.org/home/guide.php</a> |

### Genetically Modified Animals

|                 | Species     | Vendor or Source | Background Strain | Other Information    | Persistent ID / URL |
|-----------------|-------------|------------------|-------------------|----------------------|---------------------|
| Parent - Male   | Danio rerio |                  | CRISPR Cas9-nrp1a | Heat shock inducible |                     |
| Parent - Female | Danio rerio |                  | CRISPR Cas9-nrp1b | Heat shock inducible |                     |

### Antibodies

| Target antigen                        | Vendor or Source | Catalog # | Working concentration | Lot # | Persistent ID / URL                                                                                                                                                                                                                                                                                                                                                                                                   |
|---------------------------------------|------------------|-----------|-----------------------|-------|-----------------------------------------------------------------------------------------------------------------------------------------------------------------------------------------------------------------------------------------------------------------------------------------------------------------------------------------------------------------------------------------------------------------------|
| Neuropilin-1 (D62C6) Rabbit mAb       | Cell Signaling   | 3725      | 1:1000                |       | <a href="https://www.cellsignal.com/products/primary-antibodies/neuropilin-1-d62c6-rabbit-mab/3725?site-search-type=Products&amp;N=4294956287&amp;Ntt=d62c6&amp;fromPage=plp">https://www.cellsignal.com/products/primary-antibodies/neuropilin-1-d62c6-rabbit-mab/3725?site-search-type=Products&amp;N=4294956287&amp;Ntt=d62c6&amp;fromPage=plp</a>                                                                 |
| MYH6                                  | Abcam            | ab207926  | 1:200                 |       |                                                                                                                                                                                                                                                                                                                                                                                                                       |
| BrdU (Bu20a) Mouse mAb                | Cell Signaling   | 5292      | 1:200                 |       | <a href="https://www.cellsignal.com/products/primary-antibodies/brdu-bu20a-mouse-mab/5292?site-search-type=Products&amp;N=4294956287&amp;Ntt=brdu&amp;fromPage=plp">https://www.cellsignal.com/products/primary-antibodies/brdu-bu20a-mouse-mab/5292?site-search-type=Products&amp;N=4294956287&amp;Ntt=brdu&amp;fromPage=plp</a>                                                                                     |
| VE-Cadherin (D87F2) XP® Rabbit mAb    | Cell Signaling   | 2500      | 1:200                 |       | <a href="https://www.cellsignal.com/products/primary-antibodies/ve-cadherin-d87f2-xp-rabbit-mab/2500?site-search-type=Products&amp;N=4294956287&amp;Ntt=d87f2&amp;fromPage=plp">https://www.cellsignal.com/products/primary-antibodies/ve-cadherin-d87f2-xp-rabbit-mab/2500?site-search-type=Products&amp;N=4294956287&amp;Ntt=d87f2&amp;fromPage=plp</a>                                                             |
| Anti-Actin antibody, Mouse monoclonal | Millipore Sigma  | A3853     | 1:5000                |       | <a href="https://www.sigmaaldrich.com/US/en/product/sigma/a3853">https://www.sigmaaldrich.com/US/en/product/sigma/a3853</a>                                                                                                                                                                                                                                                                                           |
| Anti-rabbit IgG, HRP-linked Antibody  | Cell Signaling   | 7074S     | 1:10000               | 29    | <a href="https://www.cellsignal.com/products/secondary-antibodies/anti-rabbit-igg-hrp-linked-antibody/7074s?site-search-type=Products&amp;N=4294956287&amp;Ntt=7074s&amp;fromPage=plp&amp;_requestid=3345199">https://www.cellsignal.com/products/secondary-antibodies/anti-rabbit-igg-hrp-linked-antibody/7074s?site-search-type=Products&amp;N=4294956287&amp;Ntt=7074s&amp;fromPage=plp&amp;_requestid=3345199</a> |
| Anti-mouse IgG, HRP-linked Antibody # | Cell Signaling   | 7076      | 1:10000               | 35    | <a href="https://www.cellsignal.com/products/secondary-antibodies/anti-mouse-igg-hrp-linked-antibody/7076?site-search-type=Products&amp;N=4294956287&amp;Ntt=7076&amp;fromPage=plp&amp;_requestid=3345199">https://www.cellsignal.com/products/secondary-antibodies/anti-mouse-igg-hrp-linked-antibody/7076?site-search-type=Products&amp;N=4294956287&amp;Ntt=7076&amp;fromPage=plp&amp;_requestid=3345199</a>       |

### DNA/cDNA Clones

| Clone Name           | Source / Repository                        | Persistent ID / URL                                                                 |
|----------------------|--------------------------------------------|-------------------------------------------------------------------------------------|
| pDestTol2pA2-U6:gRNA | Addgene/doi: 10.1016/j.devcel.2015.01.032. | #63157/ <a href="https://www.addgene.org/63157/">https://www.addgene.org/63157/</a> |

DOI [to be added]

|             |                                               |                                                                                                                                          |
|-------------|-----------------------------------------------|------------------------------------------------------------------------------------------------------------------------------------------|
| pME-Cas9    | Addgene/doi:<br>10.1016/j.devcel.2015.01.032. | #63154/<br><a href="https://www.addgene.org/search/catalog/plasmids/?q=PME+">https://www.addgene.org/search/catalog/plasmids/?q=PME+</a> |
| pENTR5'_ubi | Addgene/doi:<br>10.1016/j.devcel.2015.01.032. | <a href="https://www.addgene.org/27320/">https://www.addgene.org/27320/</a>                                                              |
| P3E-PolyA   | Tol2Kit                                       | <a href="http://tol2kit.genetics.utah.edu/index.php/P3E-polyA">http://tol2kit.genetics.utah.edu/index.php/P3E-polyA</a>                  |

### Cultured Cells

| Name                                   | Vendor or Source | Sex (F, M, or unknown) | Persistent ID / URL                                                                                                     |
|----------------------------------------|------------------|------------------------|-------------------------------------------------------------------------------------------------------------------------|
| HL-1 Cardiac Muscle Cell Line (SCC065) | Sigma            |                        | <a href="https://www.sigmaaldrich.com/US/en/product/mm/scc065">https://www.sigmaaldrich.com/US/en/product/mm/scc065</a> |

### Data & Code Availability

| Description | Source / Repository | Persistent ID / URL |
|-------------|---------------------|---------------------|
| NA          | NA                  | NA                  |

### Other

| Description                                     | Source / Repository     | Persistent ID / URL                                                                                                                                                     |
|-------------------------------------------------|-------------------------|-------------------------------------------------------------------------------------------------------------------------------------------------------------------------|
| NP-40 Lysis Buffer (BP-119)                     | Boston Bioproduct       | <a href="https://www.bostonbioproducts.com/products/np-40-lysis-buffer-bp-119">https://www.bostonbioproducts.com/products/np-40-lysis-buffer-bp-119</a>                 |
| Alexa Fluor™ 488 Phalloidin (A12379)            | ThermoFisher Scientific | <a href="https://www.thermofisher.com/order/catalog/product/A12379">https://www.thermofisher.com/order/catalog/product/A12379</a>                                       |
| Claycomb Medium                                 | 51800C                  |                                                                                                                                                                         |
| HyperScribe™ T7 High Yield Cy3 RNA Labeling Kit | K1061                   | <a href="https://www.apexbt.com/hyperscribetm-t7-high-yield-cy3-rna-labeling-kit.html">https://www.apexbt.com/hyperscribetm-t7-high-yield-cy3-rna-labeling-kit.html</a> |
| MS-550S transducer                              | VisualSonics            | Vevo 3100                                                                                                                                                               |
| iWORX ECG instrument                            | SKU ZS-200              | iWorx.Inc                                                                                                                                                               |

### ARRIVE GUIDELINES

The ARRIVE guidelines (<https://arriveguidelines.org/>) are a checklist of recommendations to improve the reporting of research involving animals. Key elements of the study design should be included below to better enable readers to scrutinize the research adequately, evaluate its methodological rigor, and reproduce the methods or findings.

### Study Design

| Groups | Sex | Age | Number (prior to experiment) | Number (after termination) | Littermates (Yes/No) | Other description |
|--------|-----|-----|------------------------------|----------------------------|----------------------|-------------------|
|        |     |     |                              |                            |                      |                   |

**Sample Size:** Please explain how the sample size was decided Please provide details of any *prior* sample size calculation, if done.

**Answer:** The sample size was calculated based on the previous related study. DOI: 10.1242/dev.174482

### Inclusion Criteria

Not done

DOI [to be added]

**Exclusion Criteria**

**Not done**

**Randomization**

**Not done**

**Blinding**

**Not done**
